# Supplementary material
Source: publisher figshare collection journal article supplement (https://gsapubs.figshare.com/articles/dataset/_/12542909)
Supplement: Supplementary file 1 [file 1]

## Sheet: Sheet1
Depth (ft)	Lithofacies	TOC (%)	TS (%)	Tmax (°C)	Calculated Ro (%)	XRF-Al (%)	XRF-Si (%)	XRF-Ti (%)	XRF-Fe (%)	XRF-Ni (PPM)	XRF-Cu (PPM)	XRF-U (PPM)	XRF-Mo (PPM)	Pyrite Fe (%)	DOPT	Mo/TOC (10-4)	MoEF	UEF	Siexcess (%)	100*(Ti/Al)	TOCO (%)	Mo/TOCO (10-4)	Mean pyrite framboids size (micron)
7871	Argillaceous mudrocks	1.389	0.8341	446	0.868	5.85574	23.6271	0.339545	4.31243	82.4529	37.7527	7.99695	5.88603	0.729837	0.16924	4.2376	3.41759	3.26282	1.2582	5.7985	1.57896	3.72779	—
7872.5	Argillaceous mudrocks	2.325*	0.665	448	0.904	6.06855	23.427	0.358107	3.35021	75.3521	48.007	7.52708	6.73649	0.581875	0.173683	2.89742	3.77422	2.96341	0.245112	5.90102	2.70482	2.49055	5.61075
7874	Argillaceous mudrocks	2.786	1.047	447	0.886	6.28957	22.7494	0.33684	3.22665	57.1269	45.3602	7.36737	4.65002	0.916125	0.283924	1.66907	2.5137	2.79861	-1.27676	5.35554	3.27893	1.41815	—
7875.17	Argillaceous mudrocks	8.32*	2.24	455	1.03	5.94763	20.2681	0.349107	3.65602	104.521	89.127	18.6685	8.49729	1.96	0.536103	1.02131	4.85753	7.49921	-2.45183	5.86968	11.3858	0.746304	2.93946
7877	Skeletal-bearing argillaceous mudrocks	1.111	1.122	452	0.976	5.37385	18.5698	0.335177	5.25299	43.0252	27.3171	9.43933	0.145683	0.98175	0.186894	0.131127	0.0921724	4.19668	-1.95833	6.23718	1.25442	0.116135	—
7879.89	Skeletal-bearing argillaceous mudrocks	1.32	1.17333	457	1.066	6.46342	18.8734	0.330703	3.40452	57.595	28.5828	4.13253	0.928566	1.02667	0.30156	0.703459	0.48846	1.52758	-5.81685	5.11653	1.498	0.619871	—
7881	Skeletal-bearing argillaceous mudrocks	1.145	1.092	448	0.904	6.68713	20.0809	0.340257	3.68767	43.4438	24.4453	8.87584	2.39502	0.9555	0.259107	2.09172	1.21772	3.17118	-5.46398	5.08824	1.29388	1.85104	—
7883	Skeletal-bearing argillaceous mudrocks	1.348	0.8024	444	0.832	6.75642	19.2965	0.324001	3.05415	52.4638	34.3003	4.92744	3.13493	0.7021	0.229884	2.32562	1.57757	1.74243	-6.51306	4.79545	1.53082	2.04788	—
7885	Skeletal-bearing argillaceous mudrocks	2.054	1.332	450	0.94	6.5939	19.2248	0.344984	3.11517	75.5942	90.5628	6.12884	4.58034	1.1655	0.374136	2.22996	2.36175	2.22068	-5.96396	5.23187	2.37347	1.92981	—
7887	Skeletal-bearing argillaceous mudrocks	0.8893	1.079	446	0.868	7.21493	21.6952	0.308386	3.1344	46.0946	28.5021	5.78492	0.1	0.944125	0.301214	0.112448	0.0471245	1.91565	-5.86588	4.27427	0.998729	0.100127	—
7888.28	Argillaceous mudrocks	0.929*	1.54667	453	0.994	6.85562	22.3183	0.380735	3.32732	36.15	25.5093	5.77582	3.52589	1.35333	0.406734	3.79536	1.74864	2.01288	-3.87018	5.55362	1.04432	3.37627	6.22176
7889.9	Argillaceous mudrocks	1.648	0.9612	447	0.886	6.59282	20.2227	0.353538	3.32583	43.5671	30.1255	14.6429	2.5958	0.84105	0.252884	1.57512	1.33869	5.30649	-4.96188	5.36247	1.88531	1.37686	—
7892	Siliceous mudrocks	6.096	5.812	444	0.832	5.97822	22.7963	0.325891	4.4867	99.179	72.1382	6.19711	14.8764	4.48	1	2.44035	8.46067	2.47667	-0.040529	5.4513	7.83014	1.89989	—
7894	Siliceous mudrocks	3.587	0.7393	447	0.886	6.52535	21.9802	0.342653	3.33544	113.02	88.6485	15.6406	12.5707	0.646887	0.193944	3.50452	6.5499	5.72665	-2.94664	5.25112	4.30895	2.91735	—
7896	Siliceous mudrocks	1.902	0.7173	446	0.868	5.73785	23.2999	0.292704	2.81122	60.4938	43.28	7.61026	2.13239	0.627638	0.223261	1.12113	1.26356	3.16884	1.38128	5.10128	2.18956	0.97389	—
7898.8	Siliceous mudrocks	3.165	0.9389	444	0.832	6.66208	25.0062	0.348516	3.04975	86.9015	71.5779	11.4139	11.5925	0.821537	0.269379	3.6627	5.91622	4.09333	-0.442946	5.23134	3.76104	3.08225	—
7899.7	Argillaceous mudrocks	7.81	1.38667	455	1.03	6.11356	25.9056	0.337424	3.16228	107.85	88.8054	18.4449	13.5492	1.21333	0.383689	1.73485	7.53526	7.20827	2.55177	5.51927	10.53	1.28673	—
7900.5	Siliceous mudrocks	7.368	0.921	447	0.886	5.81385	21.2054	0.337113	4.05096	99.9855	103.134	10.7005	14.1074	0.805875	0.198935	1.91469	8.25016	4.39735	-1.00353	5.79845	9.8084	1.4383	—
7903	Skeletal-bearing argillaceous mudrocks	1.546	2.346	446	0.868	7.29576	19.0223	0.351641	2.7325	36.0724	34.083	6.45391	0.899378	2.05275	0.751236	0.581745	0.419132	2.1135	-8.84753	4.8198	1.7642	0.509794	—
7904.8	Skeletal-bearing argillaceous mudrocks	1.619	2.392	446	0.868	7.58667	20.7019	0.378702	2.76081	55.4701	33.6313	-0.34079	4.50264	2.093	0.75811	2.78113	2.01788		-8.27915	4.99167	1.85082	2.43279	—
7906.09	Wackestone	1.99*	1.49333	459	1.102	0.997597	3.49589	0.0723357	3.20867	20.2672	13.3109	0.0891093	3.92764	1.30667	0.40723	1.97369	13.3861	0.213412	-0.314933	7.25099	2.29587	1.71074	5.49169
7910	Wackestone	0.187	1.89	446	0.868	8.04891	21.5	0	2.28373	29.133	25.3379	10.8482	2.3	1.65375	0.724146	12.2995	0.97156	3.22011	-9.24687	0	1.42081	0.246514	—
7912.5	Skeletal-bearing argillaceous mudrocks	0.916	1.199	446	0.868	6.87329	19.5824	0.385749	2.6548	35.0291	18.1676	14.3073	1.46993	1.04913	0.39518	1.60473	0.72713	4.97328	-6.67354	5.6123	1.02938	1.42798	—
7914.7	Skeletal-bearing argillaceous mudrocks	1.98*	1.86667	454	1.012	6.48522	18.1642	0.343739	3.02186	44.9337	30.5646	8.44298	1.76314	1.63333	0.540505	0.890475	0.92436	3.11044	-6.60933	5.30034	2.28376	0.772033	5.74239
7917	Skeletal-bearing argillaceous mudrocks	1.448	1.207	446	0.868	4.80949	15.4228	0.275815	3.0476	44.7788	46.4116	15.8048	2.68306	1.05612	0.346543	1.85294	1.89675	7.85129	-2.94941	5.73482	1.64841	1.62767	—
7919.3	Skeletal-bearing argillaceous mudrocks	1.242	0.9728	447	0.886	4.14813	18.3786	0.234864	3.28039	33.3445	29.3336	9.95379	2.21521	0.8512	0.259481	1.78358	1.81568	5.73306	2.53277	5.66193	1.40681	1.57464	—
7921	Argillaceous mudrocks	1.297	1.167	446	0.868	6.62478	22.146	0.351782	2.92077	58.4999	40.1398	8.63972	7.12018	1.02113	0.349608	5.48973	3.65425	3.11587	-3.16066	5.3101	1.47107	4.84013	—
7921.47	Argillaceous mudrocks	3.73	1.12	457	1.066	7.05775	22.6805	0.32391	2.87157	65.0679	50.2794	6.74171	5.58261	0.98	0.341276	1.49668	2.68937	2.28221	-4.28007	4.58943	4.49734	1.24131	—
7922.2	Argillaceous mudrocks	1.955	0.8681	444	0.832	6.48132	22.5125	0.355664	3.03441	69.885	62.9026	2.39724	2.43497	0.759587	0.250325	1.24551	1.27735	0.883689	-2.24617	5.48753	2.25353	1.08051	—
7923.2	Calcareous mudrocks	0.2878	0.5794	441	0.778	0.317679	5.97669	0.0414896	4.36165	16.9794	6.77425	21.5985	0.123421	0.506975	0.116235	0.428842	1.32093	162.437	4.76315		0.318589	0.387399	—
7923.36	Calcareous mudrocks	0.64*	0.746667	452	0.976	4.43499	18.1527	0	2.86619	46.4684	34.9885	4.7869	4.11316	0.653333	0.227945	6.42681	3.15327	2.57876	1.21103	0	0.714454	5.75707	6.54125
7925	Argillaceous mudrocks	1.618	1.294	446	0.868	6.57968	19.6426	0.32791	3.231	46.4748	41.6666	10.0518	2.3489	1.13225	0.350433	1.45173	1.21378	3.64999	-5.49178	4.98368	1.84963	1.26993	—
7927.3	Skeletal-bearing argillaceous mudrocks	1.103	0.6482	446	0.868	7.05998	21.2212	0.352701	3.1147	31.426	28.8427	10.7511	2.49709	0.567175	0.182096	2.26391	1.20257	3.63832	-5.74793	4.99578	1.24515	2.00546	—
7928.6	Skeletal-bearing argillaceous mudrocks	0.9581	0.9504	446	0.868	6.63412	21.2399	0.333499	3.16975	34.9409	26.2047	4.57097	0.776285	0.8316	0.262355	0.810234	0.397848	1.64617	-4.10242	5.02703	1.07778	0.72026	—
7930.2	Argillaceous mudrocks	1.403	0.9332	450	0.94	5.67112	19.6298	0.319716	3.22392	49.7259	38.3584	-1.42731	2.83908	0.81655	0.253278	2.02358	1.70211		-2.03385	5.63762	1.59542	1.77952	—
7931.64	Argillaceous mudrocks	1.57	2.24	458	1.084	6.81357	21.1842	0.328459	2.86847	38.9096	41.7073	10.8615	1.76834	1.96	0.68329	1.12633	0.882411	3.80861	-4.84362	4.82065	1.79264	0.986446	—
7931.9	Argillaceous mudrocks	1.172	1.057	446	0.868	6.77135	21.2072	0.31679	2.95099	45.0864	41.4586	10.0615	0.266471	0.924875	0.313412	0.227364	0.133799	3.55008	-4.65932	4.67839	1.32526	0.201071	—
7934.7	Argillaceous mudrocks	1.978	1.42	445	0.85	6.41728	21.2526	0.350948	3.03466	46.0157	39.4879	10.2999	6.23358	1.2425	0.409436	3.15146	3.30267	3.8347	-3.26136	5.4688	2.28134	2.73242	—
7935.5	Siliceous mudrocks	4.438	0.9015	447	0.886	6.46396	20.2774	0.343883	3.46074	91.3126	61.4135	13.2232	7.45126	0.788812	0.227932	1.67897	3.91932	4.88754	-4.4149	5.32	5.45099	1.36696	—
7936.85	Argillaceous mudrocks	7.93*	1.92	458	1.084	6.45675	20.766	0.342149	3.25325	115.427	111.781	13.5291	9.17661	1.68	0.516407	1.1572	4.83222	5.00618	-3.89879	5.29909	10.7291	0.855304	3.86189
7938.7	Argillaceous mudrocks	1.16	1.733	452	0.976	6.90444	22.3731	0.378852	3.34556	48.4637	37.8093	3.72078	3	1.51638	0.453249	2.58621	1.47731	1.28753	-4.00184	5.48708	1.31131	2.28779	—
7938.71	Argillaceous mudrocks	0.839*	1.92	458	1.084	6.90444	22.3731	0.378852	3.34556	48.4637	37.8093	3.72078	7.08694	1.68	0.502157	8.44689	3.48987	1.28753	-4.00184	5.48708	0.941097	7.53051	5.80597
7940	Wackestone	0.7183	1.09	448	0.904	0.574312	1.90681	0.0508541	1.36443	18.9288	14.0632	0.917737	4.07291	0.95375	0.69901	5.67021	24.1122	3.81787	-0.28706	8.85478	0.803372	5.06978	—
7942	Argillaceous mudrocks	2.125	1.331	446	0.868	6.51118	22.2482	0.323333	3.04367	62.4786	58.9611	11.9561	0.26381	1.16463	0.382639	0.124146	0.137756	4.38714	-2.6245	4.96581	2.45985	0.107246	—
7944	Argillaceous mudrocks	2.105	1.355	445	0.85	6.1734	21.8971	0.331116	2.79975	55.613	45.1858	13.641	3.36301	1.18562	0.423475	1.59763	1.85218	5.27924	-1.68531	5.36359	2.43549	1.38084	—
7946.3	Argillaceous mudrocks	1.938	1.673	447	0.886	6.53154	21.9938	0.358145	2.97258	66.9518	50.9267	17.3302	0.650328	1.46388	0.49246	0.335567	0.338529	6.33926	-2.95665	5.48331	2.23299	0.291236	—
7948	Argillaceous mudrocks	2.216	0.9761	445	0.85	5.29551	19.9202	0.298229	3.9897	36.2313	23.7423	5.17673	4.28121	0.854087	0.214073	1.93195	2.74877	2.3356	-0.3087	5.63174	2.57101	1.66519	—
7949.25	Calcareous mudrocks	1.64*	1.28	458	1.084	3.49698	14.2365	0	3.78216	37.9234	29.5968	10.1666	4.54778	1.12	0.296127	2.77304	4.42165	6.94596	0.877984	0	1.87579	2.42446	6.55327
7950	Argillaceous mudrocks	1.348	1.031	444	0.832	5.35342	19.7468	0.324926	3.8482	48.1715	39.2833	6.61821	0.0835707	0.902125	0.234428	0.0619961	0.0530765	2.95366	-0.703236	6.0695	1.53082	0.0545921	—
7951.5	Argillaceous mudrocks	1.094	1.912	444	0.832	3.7505	19.9613	0.246525	3.60817	26.0611	15.4195	11.7379	3.41812	1.673	0.46367	3.12442	3.09868	7.47743	5.63437	6.5731	1.23472	2.76834	—
7952.74	Argillaceous mudrocks	2.31	1.76	457	1.066	6.65815	22.6302	0.389014	3.09215	64.5849	55.7889	9.77816	5.17278	1.54	0.498036	2.2393	2.64149	3.50876	-2.80394	5.84268	2.68636	1.92557	—
7955	Argillaceous mudrocks	1.858	1.474	442	0.796	6.41991	23.5272	0.408581	3.13856	50.249	32.8681	8.96755	6.08713	1.28975	0.410937	3.27617	3.22376	3.3373	-0.996833	6.36428	2.13658	2.849	—
7957	Argillaceous mudrocks	2.156	1.661	443	0.814	6.25049	23.9123	0.381442	3.40324	49.8697	40.4711	13.4277	3.12184	1.45338	0.427057	1.44798	1.69815	5.13262	0.0354241	6.1026	2.49766	1.2499	—
7959.24	Argillaceous mudrocks	7.38*	1.28	458	1.084	5.82444	24.9786	0.327065	3.13161	101.17	92.1987	12.8579	8.52382	1.12	0.357643	1.15499	4.97575	5.27434	2.72919	5.61539	9.82775	0.867322	3.49069
7961	Siliceous mudrocks	8.109	2.535	446	0.868	5.28358	25.9834	0.289869	2.92127	109.186	104.505	7.33303	8.13674	2.21813	0.759302	1.00342	5.23602	3.31593	5.80014	5.48622	11.0286	0.737783	—
7962.59	Siliceous mudrocks	9.88	2.08	458	1.084	4.52292	24.3353	0.281153	2.86387	102.499	83.6769	8.04157	7.9615	1.82	0.635503	0.805819	5.98487	4.24789	7.0577	6.21618	14.1709	0.561822	—
7962.7	Siliceous mudrocks	8.167	1.001	445	0.85	4.52292	24.3353	0.281153	2.86387	102.499	83.6769	8.04157	7.9615	0.875875	0.305836	0.974837	5.98487	4.24789	7.0577	6.21618	11.1264	0.715551	—
7966.5	Argillaceous mudrocks	1.381	1.14	444	0.832	4.43696	26.2676	0.296598	4.34511	101.713	77.9345	7.70833	4.5	0.9975	0.229568	3.25851	3.44831	4.15074	9.31846	6.68472	1.56956	2.86704	—
7966.9	Calcareous mudrocks	0.583	1.81333	—	—	5.20129	21.585	0	3.28934	37.894	25.1151	13.5762	4.89219	1.58667	0.482367	8.39141	3.19795	6.23619	1.71607	0	0.649934	7.52722	—
7968.5	Siliceous mudrocks	2.697	0.9531	444	0.832	5.40584	19.2235	0.332568	3.28814	65.4402	44.996	15.8262	6.53107	0.833962	0.253628	2.42161	4.10771	6.99462	-1.42682	6.15202	3.16705	2.06219	—
7969.58	Argillaceous mudrocks	1.67	1.38667	459	1.102	5.95722	22.9751	0.316807	2.921	41.6736	41.8024	11.7711	5.26884	1.21333	0.415383	3.155	3.00712	4.7209	0.218527	5.31803	1.91151	2.75637	—
7972	Siliceous mudrocks	1.213	1.689	446	0.868	5.80186	20.1635	0.323868	3.60073	42.9484	23.2329	3.40095	0.00288157	1.47788	0.410438	0.00237557	0.00168865	1.4005	-1.99957	5.58215	1.37299	0.00209876	—
7974	Skeletal-bearing argillaceous mudrocks	1.841	1.157	446	0.868	5.21041	18.1697	0.344203	2.84701	35.8411	24.6736	3.98878	0.418152	1.01238	0.355592	0.227133	0.272861	1.82902	-1.73407	6.60607	2.11615	0.197601	—
7976	Skeletal-bearing argillaceous mudrocks	2.158	0.988	446	0.868	5.8817	24.65	0.324122	2.69312	55.769	46.5832	8.08491	4.03543	0.8645	0.321003	1.86999	2.33274	3.28415	2.1819	5.51068	2.5001	1.61411	—
7978	Argillaceous mudrocks	1.781	0.8103	446	0.868	5.49368	24.2278	0.299979	2.19973	49.1681	34.9411	0.217603	2.50936	0.709013	0.322318	1.40896	1.55303	0.094635	3.24188	5.46044	2.04415	1.22758	—
7979	Calcareous mudrocks	0.414	0.1503	444	0.832	0.631108	2.13898	0.0791592	4.34504	20.3197	11.6506	5.61735	1.07429	0.131512	0.0302673	2.59491	5.7876	21.2657	-0.271851	—	0.45967	2.3371	—
7981	Skeletal-bearing argillaceous mudrocks	1.61	1.393	445	0.85	6.50774	21.8109	0.332526	3.12104	66.7565	35.6157	13.1911	1.62988	1.21887	0.390535	1.01235	0.85154	4.84286	-3.04863	5.1097	1.84012	0.885746	—
7982.83	Skeletal-bearing argillaceous mudrocks	2.18	1.17333	458	1.084	5.44787	20.2392	0.311865	3.71408	61.4108	39.5182	13.8948	5.70342	1.02667	0.276426	2.61625	3.55949	6.09362	-0.571629	5.72453	2.52697	2.25702	—
7985.1	Argillaceous mudrocks	1.522	1.06	445	0.85	5.91888	19.4932	0.34902	3.31176	53.3163	27.4598	13.8143	5.24332	0.9275	0.280063	3.44502	3.01194	5.57624	-3.11695	5.89673	1.73579	3.02071	—
7985.22	Argillaceous mudrocks	1.58*	1.33333	458	1.084	5.91888	19.4932	0.34902	3.31176	53.3163	27.4598	13.8143	5.24332	1.16667	0.35228	3.31856	3.01194	5.57624	-3.11695	5.89673	1.8045	2.90568	6.2812
7987	Argillaceous mudrocks	1.638	1.156	444	0.832	5.9061	19.7295	0.322908	3.56796	46.3414	25.833	11.5929	1.85383	1.0115	0.283495	1.13177	1.06721	4.68965	-2.8318	5.46736	1.87341	0.989549	—
7988.85	Siliceous mudrocks	8.42	2.50667	458	1.084	6.16454	23.4048	0.376405	3.54628	96.5026	72.7163	16.7256	15.0266	2.19333	0.618488	1.78463	8.28778	6.48235	-0.143745	6.10597	11.5567	1.30025	—
7989.66	Siliceous mudrocks	7.29*	4.69333	454	1.012	5.44603	22.4048	0.304167	4.38024	140.781	110.597	9.81537	12.9692	4.10667	0.937544	1.77904	8.09675	4.30603	1.601	5.5851	9.68296	1.33938	1.73528
7990.4	Siliceous mudrocks	8.141	1.258	444	0.832	6.56834	22.8734	0.382626	3.29011	61.0484	46.5228	16.6064	13.5838	1.10075	0.334563	1.66857	7.03146	6.04048	-2.21762	5.82531	11.0825	1.2257	—
7991.1	Wackestone	0.5	0.2	—	—	16	22.6664	—	—	15	10	7	2.3	0.175	0.18	8	0.48875	1.04527	—	—	0.556298	4.13447	—
7992.64	Siliceous mudrocks	4.33*	1.70667	459	1.102	6.07851	24.3545	0.317937	2.9941	83.598	63.5872	16.1854	9.08439	1.49333	0.498758	2.09801	5.08133	6.36175	1.13465	5.23051	5.30322	1.71299	3.5447
7994	Siliceous mudrocks	3.457	6.381	438	0.724	5.5762	25.7198	0.318376	2.61018	80.1861	52.4768	16.7574	6.91884	2.61	1	2.0014	4.21865	7.17989	4.41872	5.70955	4.13889	1.67166	—
7996.8	Siliceous mudrocks	2.396	1.396	446	0.868	5.1788	21.1251	0.286447	2.90155	56.1758	42.7966	13.2194	4.88941	1.2215	0.420982	2.04065	3.21	6.09862	1.3421	5.53115	2.79238	1.75098	—
7997.6	Calcareous mudrocks	0.2593	0.266667	—	—	2.71103	10.5516	0	5.87861	26.742	24.4874	8.87621	1	0.233333	0.0396919	3.85654	1.25414	7.82247	0.195511	0	0.355621	4.06057	5.77457
8000	Argillaceous mudrocks	1.117	1.265	445	0.85	5.81433	23.025	0.329323	2.63642	33.2036	17.9339	7.63347	3	1.10687	0.41984	2.68577	1.75429	3.1367	0.814309	5.66398	1.26138	2.37835	—
8001	Calcareous mudrocks	0.2586	0.1456	460	1.12	0.396213	1.3668	0.050776	2.20229	14.1328	7.05059	-3.5827	1.66987	0.1274	0.057849	6.45735	14.3296		-0.146732		0.286066	5.83736	—
8002	Skeletal-bearing argillaceous mudrocks	0.7471	0.9561	453	0.994	2.63413	7.98843	0.187648	6.79588	21.0428	16.4877	1.51966	2.95196	0.836587	0.123102	3.95123	3.81024	1.37835	-2.07396	7.1237	0.836162	3.53037	—
8004.5	Skeletal-bearing argillaceous mudrocks	1.67	1.454	447	0.886	5.6508	20.2343	0.294379	2.48755	41.4533	30.3735	7.45328	1.79084	1.27225	0.511446	1.07236	1.07752	3.15129	-1.35175	5.20952	1.91151	0.936871	—
8005.3	Skeletal-bearing argillaceous mudrocks	1.54	2.08	452	0.976	6.73757	21.2837	0.334084	2.70341	50.1815	29.3766	10.1611	3	1.82	0.673224	1.94805	1.5139	3.6032	-4.45384	4.95853	1.75709	1.70736	—
8006	Skeletal-bearing argillaceous mudrocks	1.728	1.321	447	0.886	6.37114	21.4351	0.318831	2.63133	34.6321	22.7943	6.51967	1.14189	1.15587	0.439274	0.660813	0.609375	2.44489	-2.90267	5.0043	1.98073	0.576498	—
8006.82	Skeletal-bearing argillaceous mudrocks	1.75*	1.70667	455	1.03	6.45181	20.6653	0.340144	3.142	50.94	32.0499	11.9804	3.20136	1.49333	0.475282	1.82935	1.68707	4.43649	-3.98062	5.27206	2.00703	1.59507	4.86835
8008.4	Skeletal-bearing argillaceous mudrocks	1.488	1.764	447	0.886	6.47384	22.6565	0.33479	3.02756	44.8045	28.2387	10.5257	2.81437	1.5435	0.509817	1.89138	1.47808	3.88455	-2.07353	5.17143	1.6956	1.65981	—
8010	Calcareous mudrocks	0.321	0.2562	451	0.958	6.26964	22.8227	0	2.60278	44.4709	30.161	12.157	1.4	0.224175	0.0861291	4.36137	0.759214	4.63271	-1.12731	0	0.286845	5.14825	—
8012	Skeletal-bearing argillaceous mudrocks	1.499	1.378	446	0.868	5.00022	18.9921	0.286216	3.87066	35.9388	29.346	8.34523	1.01745	1.20575	0.31151	0.678755	0.691838	3.98749	-0.108751	5.72406	1.7086	0.595491	—
8014	Skeletal-bearing argillaceous mudrocks	1.57	1.382	447	0.886	5.48957	21.0767	0.302494	3.41037	42.5283	35.5015	1.69127	3.36009	1.20925	0.35458	2.14018	2.08109	0.736079	0.106531	5.51034	1.79264	1.87438	—
8016	Skeletal-bearing argillaceous mudrocks	1.086	1.425	450	0.94	6.21011	23.7999	0.318464	2.16805	29.0258	27.3718	15.6241	1.72947	1.24687	0.575115	1.59252	0.946876	6.01101	0.0773003	5.12815	1.22545	1.4113	—
8018	Skeletal-bearing argillaceous mudrocks	1.213	1.342	449	0.922	5.94889	23.0144	0.325036	3.28618	37.5397	28.6976	15.5366	2.59977	1.17425	0.357329	2.14326	1.48586	6.23979	0.28964	5.4638	1.37299	1.89352	—
8020.35	Skeletal-bearing argillaceous mudrocks	2.68*	1.70667	453	0.994	6.18896	24.581	0.330995	3.19076	60.6327	49.6367	5.15836	4.51127	1.49333	0.468018	1.68331	2.47833	1.99134	0.939168	5.34814	3.14574	1.43409	4.23245
8020.5	Skeletal-bearing argillaceous mudrocks	2.534	1.801	452	0.976	6.33817	24.4902	0.380142	3.156	65.0729	50.9841	12.7031	5.48248	1.57587	0.499327	2.16357	2.94098	4.78846	0.278416	5.99766	2.96345	1.85003	—
8023.1	Skeletal-bearing argillaceous mudrocks	1.087	1.526	447	0.886	6.29108	21.9497	0.359083	5.16912	32.9909	24.0552	10.7123	7.65061	1.33525	0.258313	7.03828	4.13476	4.06826	-2.08222	5.70781	1.22661	6.2372	—
8025	Skeletal-bearing argillaceous mudrocks	0.9864	1.2	450	0.94	6.82646	22.1361	0.38831	2.45425	25.9592	22.4595	10.443	7.27084	1.05	0.427828	7.37109	3.62133	3.65494	-3.94103	5.6883	1.11038	6.54807	—
8031	Argillaceous mudrocks	0.7887	0.928	452	0.976	5.18194	20.553	0.352506	2.6086	24.9867	20.5168	17.0432	3.30478	0.812	0.311278	4.19016	2.16835	7.85795	0.757998	6.80257	0.883605	3.74011	—
8032.2	Argillaceous mudrocks	0.9337	1.141	446	0.868	6.22926	23.8795	0.364642	2.4315	34.8165	26.3141	10.1901	5.16489	0.998375	0.410601	5.53163	2.81905	3.90834	0.0836877	5.85369	1.04972	4.92026	—
8034	Argillaceous mudrocks	1.295	1.151	447	0.886	4.22971	17.3251	0.324951	2.65904	38.5849	27.7597	15.4705	6.56367	1.00713	0.378755	5.06847	5.27613	8.73866	1.16761	7.68259	1.46873	4.46893	—
8035.24	Argillaceous mudrocks	0.967*	1.6	449	0.922	6.50235	24.7804	0.394465	3.14484	35.8257	31.8603	11.508	4.82973	1.4	0.445173	4.99455	2.5254	4.22842	-0.0585743	6.0665	1.08803	4.43896	4.91315
8036	Argillaceous mudrocks	0.8589	1.341	450	0.94	5.8603	22.6483	0.361831	2.80509	36.1831	24.8551	12.865	5.07605	1.17338	0.418302	5.90994	2.945	5.24495	0.262	6.17428	0.963881	5.26626	—
8038	Argillaceous mudrocks	1.084	0.8817	446	0.868	6.43696	26.4694	0.358882	2.30357	28.1431	25.7874	9.09894	3.86474	0.771487	0.334909	3.56526	2.04135	3.37723	1.88018	5.57533	1.22314	3.1597	—
8039.8	Argillaceous mudrocks	3.231	1.461	446	0.868	6.68971	22.4204	0.356882	2.85859	72.1991	44.985	20.2897	9.88886	1.27838	0.447205	3.06062	5.02594	7.24634	-3.13432	5.33479	3.84595	2.57124	—
8042	Argillaceous mudrocks	2.937	1.901	445	0.85	5.91792	23.089	0.363472	2.99416	53.2616	38.9145	6.09471	3.8994	1.66338	0.55554	1.32768	2.24031	2.46056	0.482533	6.14188	3.4699	1.12378	—
8044	Argillaceous mudrocks	2.324	2.204	444	0.832	6.29838	22.5713	0.350557	3.17484	57.881	45.1533	15.6059	6.29068	1.9285	0.607433	2.70683	3.39585	5.91984	-1.48845	5.56583	2.70359	2.32679	—
8044.8	Argillaceous mudrocks	2.234	2.187	446	0.868	5.70094	20.825	0.342245	3.27735	57.9516	48.561	19.9354	3.04138	1.91362	0.583894	1.36141	1.81386	8.35466	-0.952606	6.0033	2.59306	1.17289	—
8044.86	Argillaceous mudrocks	2.9	2.02667	452	0.976	5.70094	20.825	0.342245	3.27735	57.9516	48.561	19.9354	3.04138	1.77333	0.541087	1.04875	1.81386	8.35466	-0.952606	6.0033	3.42297	0.888522	—
8046	Argillaceous mudrocks	5.06	1.885	445	0.85	5.52082	24.6335	0.304978	3.67443	76.7146	61.4989	20.8053	21.6173	1.64938	0.44888	4.2722	13.313	9.0037	3.54392	5.52413	6.31871	3.42116	—
8048.4	Siliceous mudrocks	4.418	2.501	445	0.85	4.83458	23.794	0.317084	3.53108	57.6748	49.7422	11.8396	14.541	2.18837	0.619746	3.2913	10.2262	5.85101	5.32597	6.55866	5.42356	2.68107	—
8048.88	Siliceous mudrocks	4.35*	2.93333	448	0.904	4.68094	24.7001	0.322028	3.69192	56.9489	38.642	9.30191	6.87264	2.56667	0.695212	1.57992	4.99194	4.74777	6.81885	6.87956	5.33052	1.2893	3.27574
8050	Siliceous mudrocks	4.444	2.772	445	0.85	4.73463	24.7667	0.29427	3.74829	60.5341	48.6394	11.7002	6.34304	2.4255	0.647095	1.42733	4.55502	5.90418	6.68044	6.21527	5.45923	1.16189	—
8051.13	Argillaceous mudrocks	4.84	2.4	448	0.904	5.3674	24.7282	0.295623	3.6691	76.9065	55.1167	12.9723	2.64297	2.1	0.572347	0.546069	1.6742	5.77438	4.22469	5.50776	6.00851	0.439872	—
8052	Siliceous mudrocks	3.518	2.965	445	0.85	6.26342	23.6868	0.337937	3.15341	68.5375	58.4857	13.1572	8.89875	2.59437	0.822721	2.52949	4.83055	5.01883	-0.239455	5.39541	4.21855	2.10943	—
8054	Siliceous mudrocks	5.544	2.711	446	0.868	4.88191	22.8708	0.31448	4.37343	79.5528	54.1995	10.801	14.6058	2.37213	0.542394	2.63452	10.1722	5.28596	4.22188	6.44174	7.01422	2.08231	—
8055.8	Siliceous mudrocks	5.112	2.841	445	0.85	4.83127	24.8753	0.299674	3.3942	63.6275	48.202	10.4189	2.66373	2.48588	0.732388	0.521075	1.8746	5.15244	6.41983	6.20281	6.39257	0.416692	—
8055.9	Siliceous mudrocks	5.07*	4.26667	450	0.94	4.83127	24.8753	0.299674	3.3942	63.6275	48.202	10.4189	2.66373	3.394	1	0.525391	1.8746	5.15244	6.41983	6.20281	6.3329	0.420618	3.03874
8058.35	Siliceous mudrocks	4.88*	3.04	456	1.048	4.50379	25.7775	0.272088	3.51724	63.9213	49.3972	8.19783	5.84286	2.66	0.756276	1.19731	4.41089	4.34882	8.57307	6.04131	6.06464	0.963431	3.10313
8058.6	Siliceous mudrocks	4.895	1.982	447	0.886	4.75794	26.4938	0.287879	3.32302	67.3429	51.4729	8.82174	3.85967	1.73425	0.52189	0.788493	2.7581	4.42982	8.31849	6.05049	6.08572	0.634218	—
8060	Siliceous mudrocks	3.74	1.154	445	0.85	5.73196	26.436	0.31962	2.5008	61.8373	52.0454	13.9213	5.95345	1.00975	0.403771	1.59183	3.53138	5.80265	4.53993	5.5761	4.51056	1.31989	—
8061.3	Siliceous mudrocks	7.01	2.88	457	1.066	4.71892	26.0382	0.281275	2.95497	81.993	77.7045	13.5311	7.45174	2.52	0.852799	1.06302	5.36901	6.85079	8.01194	5.96059	9.23721	0.806708	—
8062	Siliceous mudrocks	6.612*	3.375	445	0.85	4.44689	28.1016	0.250115	4.20731	72.7859	65.4977	8.4892	9.65087	2.95312	0.701903	1.4596	7.37885	4.56101	11.1145	5.6245	8.61565	1.12016	2.76232
8062.62	Siliceous mudrocks	5.85*	3.36	453	0.994	1.42204	12.5071	0.25	2.00047	31.9393	14.0746	19.3376	3.32411	2	1	0.568224	7.9477	32.4893	7.07489	7.58	7.46347	0.445384	3.13878
8062.8	Wackestone	0.4	0.2	—	—	16	18.964	—	—	12	9	4	3	0.175	0.05	0.5	0.6375	0.597297	—	—	0.443977	6.75711	—
8063.9	Siliceous mudrocks	5.282	1.904	445	0.85	3.96232	30.0877	0.254	2.92589	51.892	48.7054	12.9496	7.69404	1.666	0.569399	1.45665	6.60212	7.80832	14.9516	6.41038	6.63547	1.15953	—
8066	Siliceous mudrocks	5.396	2.262	445	0.85	4.55505	28.4081	0.265499	3.88681	73.5654	50.7003	8.40941	13.6969	1.97925	0.509223	2.53834	10.2237	4.41086	11.0078	5.82867	6.79961	2.01436	—
8067.71	Siliceous mudrocks	7.03	1.65333	456	1.048	4.03811	29.7487	0.261	2.05821	82.8271	73.3166	12.6309	4.04039	1.44667	0.702876	0.574735	3.40192	7.47319	14.3231	6.46343	9.26882	0.435912	—
8068	Siliceous mudrocks	7.048	2.275	446	0.868	3.71906	32.2949	0.263	2.54686	74.0372	71.7593	7.08973	9.88434	1.99062	0.781601	1.40243	9.03636	4.55457	18.0881	7.07168	9.29729	1.06314	—
8069.3	Siliceous mudrocks	7.19*	2.72	454	1.012	3.89312	28.0794	0.262	1.9265	72.0505	58.2947	20.1755	4.25609	1.92	1	0.594426	3.717	12.3816	13.2077	6.72982	9.47512	0.449186	3.52131
8070	Siliceous mudrocks	5.627	2.838	446	0.868	1.91655	28.0693	0.25	3.08787	80.3353	50.7702	5.85042	8.87961	2.48325	0.804195	1.57804	15.7526	7.29319	20.7481	13.0443	7.13534	1.24445	—
8071.8	Siliceous mudrocks	5.45*	5.113	444	0.832	4.69356	24.9307	0.259652	4.81139	67.3845	63.4921	6.40747	10.5287	4.47388	0.92985	1.93614	7.62696	3.26163	7.00133	5.53209	6.86034	1.53472	—
8071.82	Siliceous mudrocks	5.45	4.69333	452	0.976	4.69356	24.9307	0.259652	4.81139	67.3845	63.4921	6.40747	10.5287	4.10667	0.853529	1.93187	7.62696	3.26163	7.00133	5.53209	6.87772	1.53084	2.13543
8072.4	Siliceous mudrocks	2.45	2.13333	452	0.976	1.79247	22.6694	0.25	2.06516	35.0643	24.3136	7.44387	8.41191	1.86667	0.903885	3.43343	15.9559	9.92195	15.8221	13.9472	2.85918	2.94207	—
8072.6	Siliceous mudrocks	3.409	2.062	443	0.814	1.72402	22.2691	0.25	2.11857	35.4483	28.9268	5.52814	7.90049	1.80425	0.851638	2.31754	15.5808	7.66103	15.6833	14.501	4.07639	1.93811	—
8074.5	Wackestone	1.471	1.018	428	0.544	4.59292	28.4741	0	1.34334	25.8658	15.8601	6.63506	7.19848	0.89075	0.663084	4.8936	5.32882	3.45149	10.9291	0	1.67553	4.29624	—
8075.48	Wackestone	0.384	0	454	1.012	1.40938	8.3435	0.0957075	1.78559	12.2705	14.7301	3.70011	0.335904	0	0	0.874751	0.810339	6.27246	2.95967	6.79076	0.426055	0.788406	—
8076	Wackestone	0.2879	0.1547	460	1.12	1.1602	7.35018	0.0808738	1.50805	11.7138	1.42025	-1.02738	1.9467	0.135362	0.08976	6.76171	5.70484	—	2.91821	6.97067	0.3187	6.10823	—
8077	Wackestone	0.3399	0.3976	446	0.868	1.72314	7.35885	0.106126	1.93765	12.749	8.66125	-3.59524	3.14117	0.3479	0.179547	9.24146	6.19797	—	0.776443	6.15885	0.376729	8.33801	—
8078.66	Argillaceous mudrocks	4.11	2.34667	453	0.994	4.79751	19.033	0.312523	2.55397	80.3531	69.7552	10.8155	9.04815	2.05333	0.803976	2.2015	6.41243	5.3862	0.706515	6.51427	5.00479	1.8079	—
8079	Siliceous mudrocks	3.803	2.304	444	0.832	5.88712	23.9596	0.310295	2.42396	93.4841	71.9974	12.8049	6.86466	2.016	0.831696	1.80506	3.96456	5.19665	1.47077	5.27074	4.59404	1.49425	—
8080.5	Siliceous mudrocks	5.425	2.409	446	0.868	5.56794	25.7131	0.312014	2.60378	100.017	83.0864	12.2798	9.48814	2.10787	0.809543	1.74897	5.79382	5.26924	4.44358	5.60376	6.84153	1.38684	—
8081.2	Siliceous mudrocks	1.74	2.50667	445	0.85	2.10374	15.8879	0.266	5.4627	93.6225	49.5022	42.0525	6.96403	2.19333	0.401511	4.00232	11.2551	47.7585	7.85166	12.6441	1.99507	3.49062	—
8082	Siliceous mudrocks	8.468	1.637	447	0.886	4.64379	25.3957	0.265899	2.38703	92.2508	90.1357	11.1096	10.4747	1.43237	0.600066	1.23697	7.66913	5.71578	7.65642	5.72591	11.639	0.899959	—
8082.94	Siliceous mudrocks	7.37*	3.09333	458	1.084	2.79382	26.3956	0.25	3.9367	50.2056	40.1072	9.39197	5.70256	2.70667	0.687548	0.773753	6.93985	8.03172	15.7232	8.94832	9.81162	0.581204	3.50956
8084.5	Siliceous mudrocks	4.78	3.224	447	0.886	4.94841	25.1518	0.308009	3.85141	99.2554	78.2593	14.8258	21.3341	2.821	0.732459	4.46321	14.6585	7.15821	6.24886	6.22441	5.92454	3.60098	—
8085.87	Wackestone	0.82	2.72	450	0.94	0.809796	11.6811	0.0550268	2.99592	18.6616	8.23115	7.87587	10.7743	2.38	0.794413	13.1393	45.2367	23.2367	8.58763	6.79515	0.919364	11.7192	—
8089	Siliceous mudrocks	2.98	1.864	444	0.832	6.52091	25.6959	0.374368	2.78585	53.3727	43.5742	7.07492	7.1431	1.631	0.585459	2.39702	3.72441	2.59217	0.786058	5.74104	3.52455	2.02667	—
8089.15	Argillaceous mudrocks	3.34	1.76	456	1.048	6.52091	25.6959	0.374368	2.78585	53.3727	43.5742	7.07492	7.1431	1.54	0.552794	2.13865	3.72441	2.59217	0.786058	5.74104	3.98681	1.79168	—
8092	Argillaceous mudrocks	1.661	1.603	446	0.868	5.40016	21.2455	0.281485	2.3818	49.479	37.3618	10.0091	6.61435	1.40263	0.588893	3.98215	4.16447	4.42831	0.616878	5.21253	1.90079	3.47978	—
8094	Argillaceous mudrocks	1.236	1.508	445	0.85	4.54879	21.1159	0.262004	2.31083	34.8697	31.76	14.3497	6.06264	1.3195	0.571007	4.90505	4.53153	7.53699	3.73951	5.75985	1.3998	4.33106	—
8095.62	Argillaceous mudrocks	3.82*	2.4	451	0.958	4.17607	24.3044	0.239197	2.43668	30.572	18.6038	6.83832	2.56074	2.1	0.861829	0.67035	2.08485	3.91229	8.35182	5.7278	4.61662	0.554678	5.15382
8096	Siliceous mudrocks	4.113	1.574	446	0.868	5.16244	22.9891	0.336113	3.09356	72.5653	59.4582	16.9691	8.0513	1.37725	0.445199	1.95753	5.30262	7.85335	3.26857	6.51074	5.00884	1.60742	—
8098.3	Siliceous mudrocks	5.051	3.021	446	0.868	3.63958	22.7204	0.239388	3.23551	67.8203	60.0586	8.35142	6.83565	2.64337	0.816989	1.35333	6.38569	5.48227	8.81725	6.57735	6.30595	1.084	—
8100	Siliceous mudrocks	3.677	2.829	444	0.832	4.95713	26.7401	0.275666	3.28993	62.1167	51.0614	14.0718	6.2095	2.47538	0.752409	1.68874	4.25898	6.7822	7.8039	5.561	4.42735	1.40253	—
8103.2	Argillaceous mudrocks	1.271	1.685	446	0.868	5.95264	19.9735	0.349739	2.4953	50.2156	41.6464	14.327	5.55036	1.47437	0.59086	4.36692	3.17023	5.75036	-2.76555	5.87536	1.44067	3.85262	—
8103.28	Argillaceous mudrocks	2.24	2.50667	452	0.976	6.09063	22.2639	0.338236	3.07706	52.4705	47.7703	13.2798	3.41072	2.19333	0.712801	1.52264	1.90398	5.20931	-1.00225	5.55339	2.60041	1.31161	—
8105.22	Wackestone	1.254	0	—	—	0.372216	2.96393	0.0436351	3.78422	14.6725	8.74318	2.4003	0.4	0	0	0.318979	3.65379	15.4071	1.54206	—	0.20651	11.2218	—
8109	Siliceous mudrocks	0.7037	1.014	448	0.904	6.67064	20.9274	0.351238	2.39937	32.8562	20.8126	13.3752	3.39182	0.88725	0.369785	4.81998	1.7288	4.79054	-4.55441	5.26543	0.786766	4.31109	—
8111	Argillaceous mudrocks	0.6778	1.551	446	0.868	7.95651	21.4865	0.400481	2.59291	25.416	14.62	1.57628	1.80722	1.35712	0.523398	2.6663	0.772265	0.473328	-8.90733	5.03338	0.757338	2.38627	—
8112.97	Argillaceous mudrocks	0.56*	0.693333	—	—	7.75301	20.2652	0.391321	2.18199	32.9934	32.9959	1.04709	2.99175	0.606667	0.278034	5.34241	1.312	0.322674	-9.35131	5.04735	0.623949	4.79486	6.50267
8113.42	Argillaceous mudrocks	0.705*	0.213333	476	1.408	8.43504	21.0043	0.419265	2.37172	25.655	23.8719	5.96813	2.81359	0.186667	0.0787051	3.99091	1.1341	1.69045	-11.2175	4.97051	0.788245	3.56944	7.30455
8115	Argillaceous mudrocks	0.4946	0.854	441	0.778	7.88369	18.7841	0.340511	3.99045	32.819	10.2538	7.16591	0.112795	0.74725	0.18726	0.228054	0.0486453	2.17166	-11.3316	4.31918	0.550219	0.205001	—
8116	Argillaceous mudrocks	0.5937	0.9008	460	1.12	8.52397	18.8439	0.362436	2.3818	27.5708	34.2175	11.1182	0.1	0.7882	0.330926	0.168435	0.0398875	3.11633	-13.7176	4.25196	0.662032	0.15105	—
8118	Argillaceous mudrocks	0.5304	0.2967	452	0.976	8.65679	17.6679	0.397751	2.62336	31.8116	28.2919	6.27232	0.523576	0.259613	0.0989617	0.987135	0.205637	1.7311	-15.4011	4.59467	0.590551	0.88659	—
8119.23	Argillaceous mudrocks	0.576	0.64	470	1.3	8.61125	18.4019	0.406735	2.87428	41.3264	28.4031	11.5115	4.99104	0.56	0.194831	8.665	1.97062	3.19386	-14.4931	4.72329	0.642022	7.77394	—
8120	Argillaceous mudrocks	0.6097	0.439	456	1.048	8.37309	16.4785	0.411621	2.64777	34.3741	22.549	8.42531	3.55298	0.384125	0.145075	5.82742	1.44273	2.40409	-15.5067	4.916	0.680134	5.22393	—
8120.89	Argillaceous mudrocks	0.575*	0.853333	481	1.498	8.83812	17.9048	0.385204	2.77179	31.509	22.0271	3.33133	3.87455	0.746667	0.26938	6.73835	1.49053	0.900552	-15.8568	4.35844	0.640892	6.04555	—
8122	Argillaceous mudrocks	0.6626	0.4053	462	1.156	7.88614	16.7914	0.391049	3.96685	53.5053	26.8338	-1.32026	6.32396	0.354637	0.0894003	9.54416	2.72649	—	-13.3336	4.95869	0.740084	8.54492	—
8123.15	Argillaceous mudrocks	0.673*	2.56	463	1.174	6.32149	13.5515	0.298581	7.91691	34.0035	21.9066	0.652663	0.321182	2.24	0.282939	0.477239	0.172747	0.246672	-10.5966	4.72326	0.751888	0.427168	5.0828
8124	Argillaceous mudrocks	0.5975	0.143	460	1.12	7.49342	15.0202	0.405641	2.67464	36.0173	20.0058	5.74666	2.16544	0.125125	0.046782	3.62416	0.982528	1.83226	-13.6047	5.4133	0.66633	3.2498	—
8126	Argillaceous mudrocks	0.5572	0.6753	454	1.012	7.62448	18.9941	0.339873	2.84531	26.8496	16.1764	7.55196	3.24769	0.590888	0.207671	5.82858	1.44825	2.36647	-10.1314	4.45765	0.620788	5.23156	—
8128.8	Argillaceous mudrocks	0.5805	1.832	439	0.742	7.71545	21.5385	0.362078	2.45577	17.5742	14.8629	15.5996	1.36285	1.603	0.652749	2.34772	0.600574	4.83063	-7.93452	4.6929	0.647108	2.10607	—
8128.95	Argillaceous mudrocks	2.56	3.09333	455	1.03	5.0921	20.0108	0.270728	5.4349	27.2753	26.8592	6.41468	0.411344	2.70667	0.498016	0.160681	0.274655	3.00974	0.558968	5.31664	2.99582	0.137306	—
8131	Siliceous mudrocks	3.89	1.835	446	0.868	6.36911	22.2432	0.345095	3.04646	54.8726	43.33	3.46588	11.0601	1.60562	0.527046	2.84321	5.90416	1.30012	-2.08676	5.41826	4.70978	2.34832	—
8132.57	Siliceous mudrocks	5.11*	1.49333	449	0.922	5.41492	27.4783	0.286433	2.38189	55.5154	43.47	8.33401	3.54618	1.30667	0.548585	0.693969	2.22663	3.67716	6.79327	5.28971	6.38973	0.554982	3.2136
8134.94	Siliceous mudrocks	3.86	2.77333	453	0.994	5.98792	22.9404	0.325446	3.07719	64.2439	47.4919	18.6175	9.77731	2.42667	0.788599	2.53298	5.55166	7.42841	0.0665943	5.43504	4.66981	2.09373	—
8135	Siliceous mudrocks	2.879	2.404	444	0.832	6.54091	23.0579	0.357101	3.83544	45.8785	47.088	10.7159	5.51057	2.1035	0.548437	1.91406	2.86443	3.91419	-1.92835	5.4595	3.39637	1.62249	—
8136	Siliceous mudrocks	2.826	2.119	444	0.832	7.12069	22.0333	0.380274	3.28208	49.5787	41.3091	17.6804	9.51749	1.85413	0.564923	3.36783	4.54443	5.93225	-5.16777	5.3404	3.32937	2.85864	—
8138.4	Wackestone	0.4285	1.846	428	0.544	6.77253	22.6664	0	1.9859	25.6062	20.6527	0.394381	1.82166	1.61525	0.813358	4.25124	0.914524	0.139128	-3.20468	0	0.475934	3.82754	—
8138.94	Wackestone	1.8	1.81333	457	1.066	6.1483	16.7426	0	2.09198	68.4601	56.8003	13.851	0.665879	1.58667	0.758454	0.369933	0.36823	5.38243	-6.74392	0	2.06692	0.322159	—
8140	Calcareous mudrocks	0.7519	0.34	444	0.832	1.34669	4.49807	0.0767858	1.91725	27.2276	21.4788	0.0318021	3.18577	0.2975	0.15517	4.23696	8.04312	0.0564207	-0.646295	5.70181	0.841631	3.78523	—
8140.45	Calcareous mudrocks	0.753	0.106667	463	1.174	1.1263	3.62708	0.0637413	1.45228	25.7629	9.83712	0.285837	1.95089	0.0933333	0.0642666	2.59082	5.88919	0.606336	-0.6754	5.65934	0.842884	2.31453	—
Note: 1. TOC data marked with "*" is compiled from from Peng, J.W., Milliken, K.L., Fu, Q.L., Janson, X., and Hamlin, S., 2020b, Grain assemblages and diagenesis in organic-rich mudrocks, Upper Pennsylvanian Cline Shale (Wolfcamp D), Midland Basin, Texas: AAPG Bulletin, in press. 2. "—" suggests no analytic data
